# Supplementary material for: Chitosan-Collagen 3D Matrix Mimics Trabecular Bone and Regulates RANKL-Mediated Paracrine Cues of Differentiated Osteoblast and Mesenchymal Stem Cells for Bone Marrow Macrophage-Derived Osteoclastogenesis
Source: PubMed Central journal article supplement (PMC6571924; doi:10.3390/biom9050173), 2019-05-05
Supplement: biomolecules-09-00173-s001.pdf [file biomolecules-09-00173-s001.pdf]

# Chitosan-Collagen 3D Matrix Mimics Trabecular Bone and Regulates RANKL-Mediated Paracrine Cues of Differentiated Osteoblast and Mesenchymal Stem Cells for Bone Marrow Macrophages-Derived Osteoclastogenesis

Jeevithan Elango <sup>1,2,\*</sup>, Kandasamy Saravanakumar <sup>3</sup>, Saeed Ur Rahman <sup>4</sup>, Yves Henrotin <sup>5</sup>, Joe M. Regenstein<sup>6</sup>, Wenhui Wu <sup>1, \*</sup>, and Bin Bao<sup>1</sup>

<sup>1</sup> Department of Marine Bio-Pharmacology, College of Food Science and Technology, Shanghai Ocean University, Shanghai, 201306, China; srijeevithan@gmail.com, whwu@shou.edu.cn, bbao@shou.edu.cn

<sup>2</sup> Bone Biology and Disease Unit, St. Vincent's Institute of Medical Research, Melbourne, Victoria, 3065, Australia.

<sup>3</sup> Department of Medical Biotechnology, College of Biomedical Sciences, Kangwon National University, Chuncheon, Gangwon 24341, Republic of Korea. Saravana732@gmail.com

<sup>4</sup> Interdisciplinary Research Centre in Biomedical Materials (IRCBM), COMSATS University Islamabad, Lahore Campus, Pakistan; saeedbio80@gmail.com

<sup>5</sup> Bone and Cartilage Research Unit, Arthropôle Liège, University of Liège, CHU Sart-Tilman 4000, Belgium; yhenrotin@ulg.ac.be

<sup>6</sup> Department of Food Science, Cornell University, Ithaca, NY 14853-7201, USA ;jmr9@cornell.edu.

\* Correspondence: whwu@shou.edu.cn (W.W); srijeevithan@gmail.com (J.E) Tel.: +86 21 61900388, Fax: +86 21 61900364

---

**Supplementary Table S1. List of Primers and its sequence used in this study**

| S.No | Primers                    | Sequences                                                                |
|------|----------------------------|--------------------------------------------------------------------------|
| 1    | GAPDH                      | 5'- AGC TTG TCA TCA ACG GGA AG-3'<br>5'- TTT GAT GTT AGT GGG GTC TCG-3'  |
| 2    | COL I                      | 5'- GCG AAG GCA ACA GTC GCT-3'<br>5'- CTT GGT GGT TTT GTA TTC GAT GAC-3' |
| 3    | Osteocalcin (OC)           | 5'- CTC ACA GAT GCC AAG CCC-3'<br>5'- CCA AGG TAG CGC CGG AGT CT-3'      |
| 4    | Alkaline Phosphatase (ALP) | 5'- TCC TGA CCA AAA ACC TCA AAG G-3'<br>5'- TGC TTC ATG CAG AGC CTG C-3' |
| 5    | RUNX2                      | 5'- CCA CCA CTC ACT ACC ACA CG-3'<br>5'- TCA GCG TCA ACA CCA TCA TT-3'   |
| 6    | RANKL                      | 5'- CCT GAG GCC CAG CCA TTT-3'<br>5'- CTT GGC CCA GCC TCG AT-3'          |

---

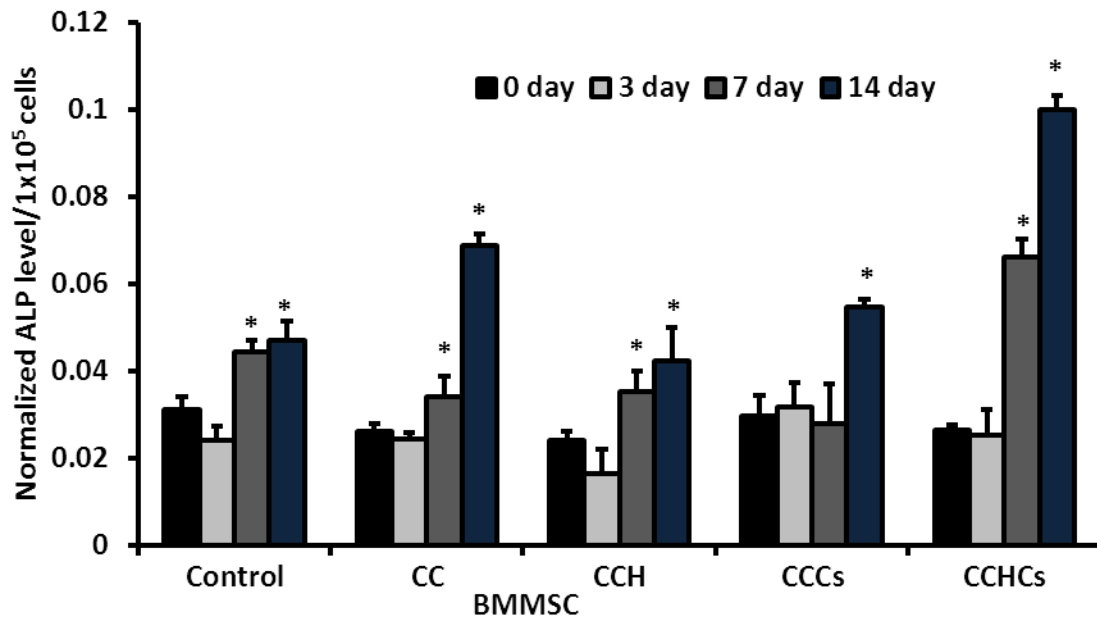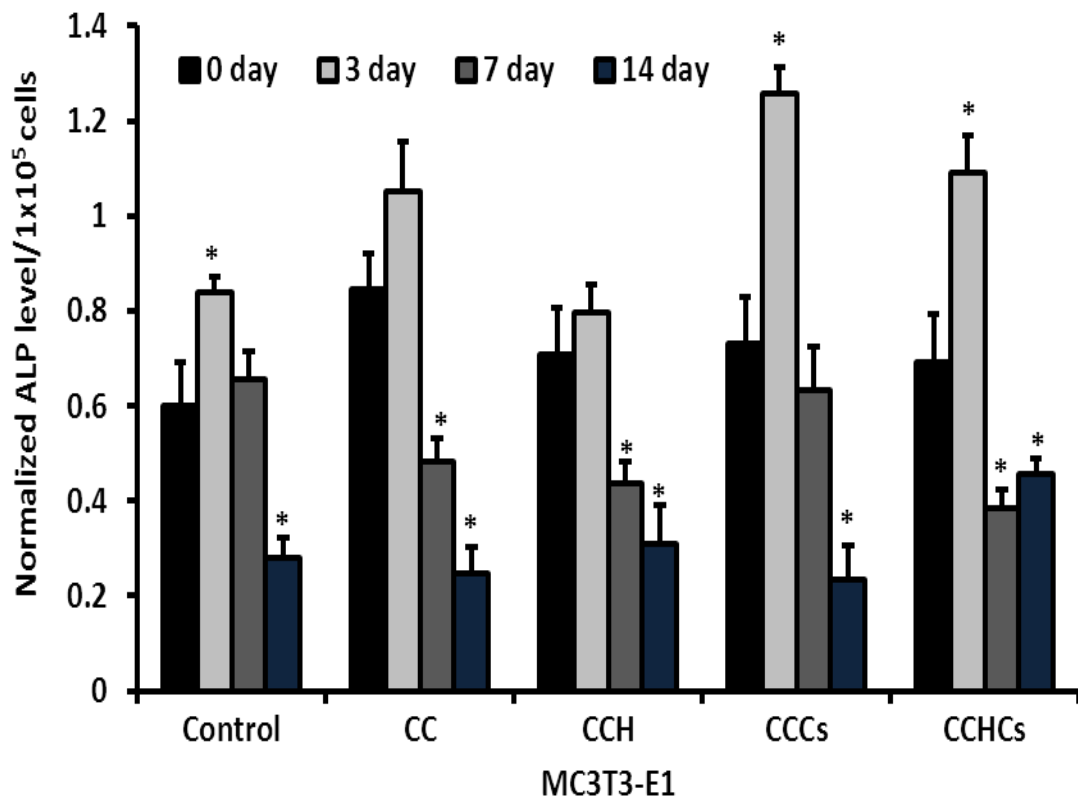

**Supplementary Fig S1.** The level of ALP in bone cells. ALP level was normalized with corresponding cell numbers at each time point. BMMSC: Bone Marrow-derived Mesenchymal Stem Cell, MC3T3-E1:pre-osteoblast. CC: collagen-chitosan 3D matrix, CCH: collagen-chitosan-hydroxyapatite 3D matrix, CCCs: collagen-chitosan-chondroitin sulphate 3D matrix and CCHCs: collagen-chitosan-hydroxyapatite-chondroitin sulphate 3D matrix. \* $p < 0.05$  vs 0 day.

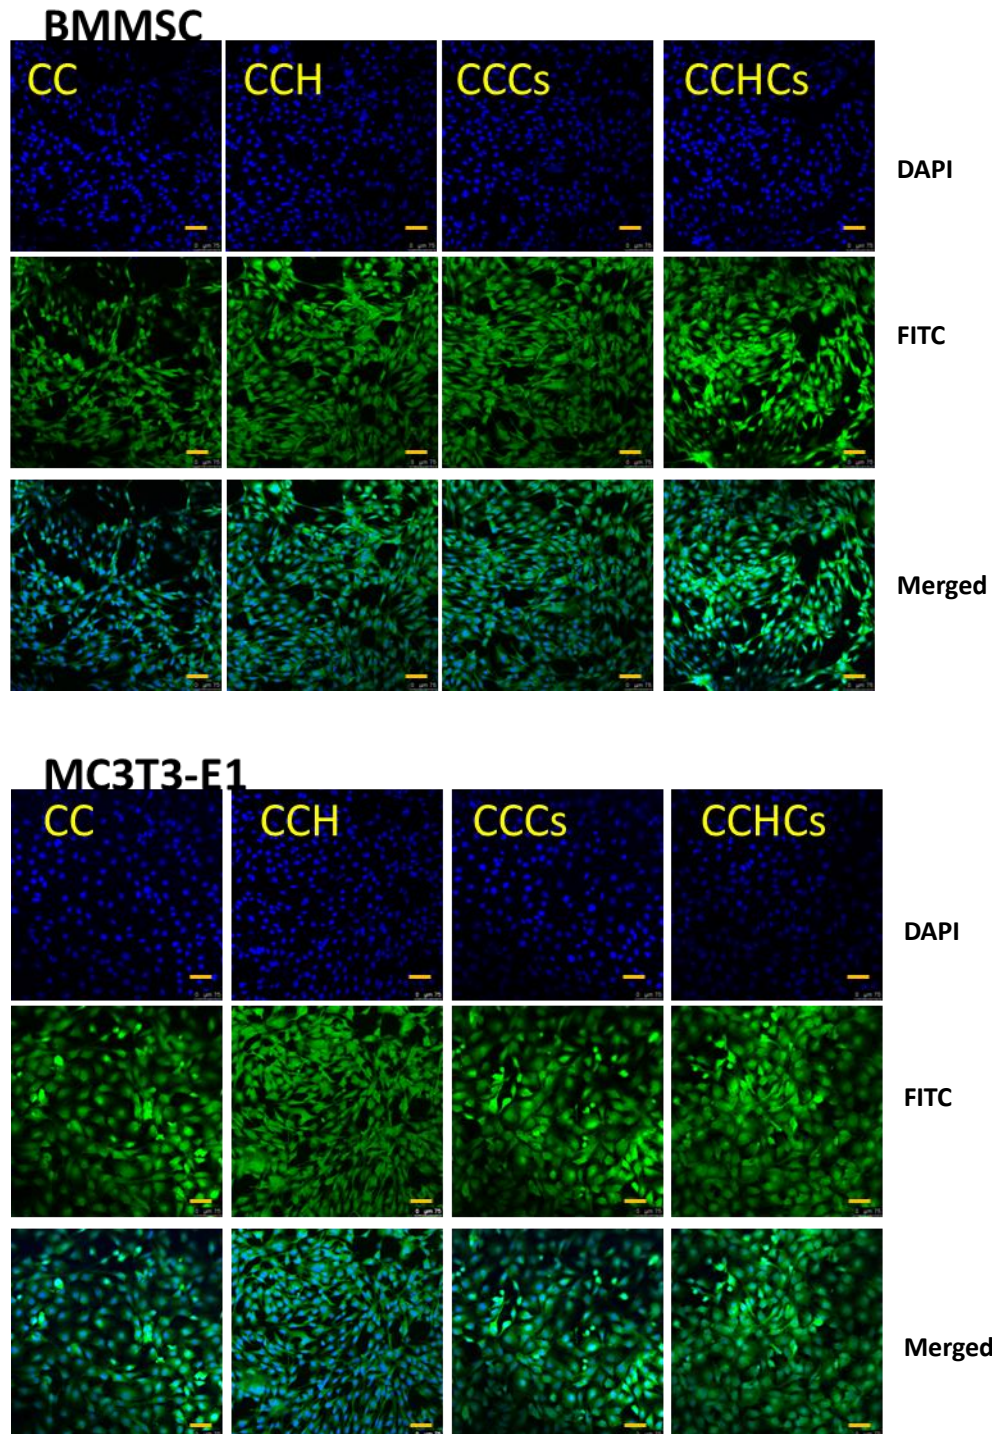

**Supplementary Fig S2.** Confocal laser scanning microscope (CLSM) images of bone cells cultured on 3D matrix conditioned medium (scale bars: 75  $\mu\text{m}$ ). For confocal microscopy, bone cells were grown in a matrix conditioned medium with osteogenic stimulatory medium for 14 days and stained with FITC and DAPI. BMMSC: Bone Marrow-derived Mesenchymal Stem Cell, MC3T3-E1:pre-osteoblast. CC: Collagen-chitosan 3D matrix, CCH: collagen-chitosan-hydroxyapatite 3D matrix, CCCs: collagen-chitosan-chondroitin sulphate 3D matrix and CCHCs: collagen-chitosan-hydroxyapatite-chondroitin sulphate 3D matrix.
